# Supplementary material
Source: publisher site journal article supplement (https://www.dovepress.com/article/356060)
Supplement: Supplementary file 1 [file get_supplementary_file.php]

**Supplementary materials**

**Circadian type determines working ability: Poorer working ability in evening-types is mediated by insufficient sleep in a large population-based sample of working-age adults**

**Supplementary Tables**

Supplementary Table 1. Work well-being as general exhaustion and working ability by circadian type. Generalized linear models, adjusted with age, gender, daily sleep duration, insomnia, education, work situation and physical work demand, with definite morning-types are as the reference group.

|  | **Definite evening-type** | | | |  | **Moderate evening-type** | | | |  | **Moderate morning-type** | | | |
| --- | --- | --- | --- | --- | --- | --- | --- | --- | --- | --- | --- | --- | --- | --- |
|  | **B** | **95% CI** | | **p-value** |  | **B** | **95% CI** | | **p-value** |  | **B** | **95% CI** | | **p-value** |
|  | **Lower** | **Upper** |  | **Lower** | **Upper** |  | **Lower** | **Upper** |
| **General exhaustion** |  |  |  |  |  |  |  |  |  |  |  |  |  |  |
| Ages 18 to 34 | 0.4 | 0.05 | 0.7 | <0.05 |  | -0.1 | -0.4 | 0.2 | 0.6 |  | -0.02 | -0.3 | 0.3 | 0.9 |
| Ages 35 to 44 | 0.4 | 0.1 | 0.7 | <0.01* |  | 0.2 | -0.1 | 0.4 | 0.1 |  | -0.01 | -0.3 | 0.2 | 0.9 |
| Ages 45 to 54 | 0.8 | 0.5 | 1.1 | <0.001* |  | 0.3 | 0.1 | 0.5 | <0.05 |  | 0.2 | -0.04 | 0.4 | 0.1 |
| Ages 55 to 64 | 0.6 | 0.3 | 0.8 | <0.001* |  | 0.4 | 0.2 | 0.6 | <0.001* |  | 0.1 | -0.1 | 0.3 | 0.1 |
| **Working ability** |  |  |  |  |  |  |  |  |  |  |  |  |  |  |
| Ages 18 to 34 | -0.03 | -0.2 | 0.2 | 0.8 |  | 0.1 | -0.1 | 0.3 | 0.3 |  | 0.1 | -0.08 | 0.3 | 0.2 |
| Ages 35 to 44 | -0.4 | -0.6 | -0.2 | <0.001* |  | -0.1 | -0.3 | 0.1 | 0.2 |  | -0.1 | -0.3 | 0.1 | 0.5 |
| Ages 45 to 54 | -0.6 | -0.8 | -0.3 | <0.001* |  | -0.1 | -0.3 | 0.1 | 0.5 |  | 0.03 | -0.2 | 0.2 | 0.8 |
| Ages 55 to 64 | -0.1 | -0.4 | 0.3 | 0.8 |  | 0.1 | -0.1 | 0.4 | 0.3 |  | 0.2 | -0.04 | 0.4 | 0.1 |

*Note: SD=Standard deviation, B=estimated coefficient, 95% CI=95% confidence intervals, p-value=Significance of the association between independent variable and dependent variable, * Bonferroni corrected p-value <0.05.*

Supplementary Table 2. Descriptive information on physical work demand by circadian type at different age groups in the population-based study sample of Finnish working age adults.

| **Physical work demand (%)** | | **Definite evening-type** | **Moderate evening-type** | **Moderate morning-type** | **Definite morning-type** | p-value |
| --- | --- | --- | --- | --- | --- | --- |
| Ages 18 to 34 | |  |  |  |  | <0.01 |
|  | Mainly sitting | 55.0 | 50.2 | 45.2 | 42.9 |  |
|  | Walking but no lifting | 21.4 | 23.0 | 27.7 | 23.5 |  |
|  | Walking and lifting | 19.7 | 22.0 | 20.9 | 26.7 |  |
|  | Heavy manual labor | 3.9 | 4.7 | 5.6 | 6.9 |  |
| Ages 35 to 44 | |  |  |  |  | <0.001 |
|  | Mainly sitting | 55.3 | 44.2 | 40.8 | 43.4 |  |
|  | Walking but no lifting | 20.7 | 30.6 | 30.7 | 26.9 |  |
|  | Walking and lifting | 21.2 | 20.3 | 22.8 | 22.6 |  |
|  | Heavy manual labor | 2.8 | 4.9 | 5.8 | 7.1 |  |
| Ages 45 to 54 | |  |  |  |  | <0.001 |
|  | Mainly sitting | 55.0 | 43.9 | 41.5 | 40.5 |  |
|  | Walking but no lifting | 25.3 | 30.1 | 25.4 | 27.2 |  |
|  | Walking and lifting | 16.1 | 20.4 | 26.0 | 22.7 |  |
|  | Heavy manual labor | 3.6 | 5.6 | 7.0 | 9.6 |  |
| Ages 55 to 64 | |  |  |  |  | <0.001 |
|  | Mainly sitting | 64.2 | 60.9 | 54.6 | 54.8 |  |
|  | Walking but no lifting | 19.4 | 20.5 | 22.1 | 21.6 |  |
|  | Walking and lifting | 14.1 | 14.8 | 17.2 | 17.6 |  |
|  | Heavy manual labor | 2.3 | 3.7 | 6.1 | 6.0 |  |

*Note: p-value=Significance of the association between independent variable and dependent variable in chi-square test.*

Supplementary Table 3. Working ability by physical work demandfor each circadian type separately. Generalized linear models, adjusted with age and gender, with those with mainly sitting work as the reference group.

|  | **Definite evening-type** | | | | |  | **Moderate evening-type** | | | | |  | **Moderate morning-type** | | | | |  | **Definite morning-type** | | | | |
| --- | --- | --- | --- | --- | --- | --- | --- | --- | --- | --- | --- | --- | --- | --- | --- | --- | --- | --- | --- | --- | --- | --- | --- |
|  | **Mean (SD)** | **B** | **95% CI** | | **p-value** |  | **Mean (SD)** | **B** | **95% CI** | | **p-value** |  | **Mean (SD)** | **B** | **95% CI** | | **p-value** |  | **Mean (SD)** | **B** | **95% CI** | | **p-value** |
|  | **Lower** | **Upper** |  | **Lower** | **Upper** |  | **Lower** | **Upper** |  | **Lower** | **Upper** |
|  |  | | | | | | | | | | | | | | | | | | |  |  |  |  |
|  | **Working ability among those with mainly sitting work** | | | | | | | | | | | | | | | | | | |  |  |  |  |
| Ages 18 to 34 | 9.0 (1.6) | ref. |  |  |  |  | 9.1 (1.4) | ref. |  |  |  |  | 9.1 (1.4) | ref. |  |  |  |  | 8.7 (2.1) | ref. |  |  | ref. |
| Ages 35 to 44 | 8.4 (2.1) | ref. |  |  |  |  | 8.6 (1.9) | ref. |  |  |  |  | 8.6 (1.9) | ref. |  |  |  |  | 8.7 (1.7) | ref. |  |  | ref. |
| Ages 45 to 54 | 7.5 (2.8) | ref. |  |  |  |  | 8.1 (2.3) | ref. |  |  |  |  | 8.1 (2.2) | ref. |  |  |  |  | 8.0 (2.4) | ref. |  |  | ref. |
| Ages 55 to 64 | 6.6 (2.8) | ref. |  |  |  |  | 6.8 (2.7) | ref. |  |  |  |  | 6.8 (2.7) | ref. |  |  |  |  | 6.6 (2.8) | ref. |  |  | ref. |
|  |  | | | | | | | | | | | | | | | | | | |  |  |  |  |
|  | **Working ability among those with walking but no lifting at work** | | | | | | | | | | | | | | | | | | |  |  |  |  |
| Ages 18 to 34 | 9.1 (1.1) | 0.2 | -0.2 | 0.4 | 0.4 |  | 9.3 (1.0) | 0.2 | -0.01 | 0.4 | 0.06 |  | 9.2 (1.1) | 0.1 | -0.1 | 0.4 | 0.3 |  | 9.3 (1.0) | 0.5 | -0.02 | 1.1 | 0.06 |
| Ages 35 to 44 | 8.5 (1.7) | 0.2 | -0.3 | 0.6 | 0.5 |  | 9.0 (1.2) | 0.3 | 0.1 | 0.6 | <0.01 |  | 9.1 (1.1) | 0.5 | 0.3 | 0.7 | <0.001* |  | 9.3 (0.9) | 0.5 | 0.2 | 0.9 | <0.001* |
| Ages 45 to 54 | 8.6 (1.4) | 1.1 | 0.6 | 1.7 | <0.001* |  | 8.5 (1.4) | 0.5 | 0.2 | 0.7 | <0.001* |  | 8.7 (1.1) | 0.6 | 0.3 | 0.9 | <0.001* |  | 8.6 (1.4) | 0.6 | 0.3 | 0.9 | <0.001* |
| Ages 55 to 64 | 8.3 (1.7) | 1.7 | 1.0 | 2.3 | <0.001* |  | 8.1 (1.4) | 1.3 | 0.9 | 1.7 | <0.001* |  | 8.3 (1.4) | 1.5 | 1.2 | 1.8 | <0.001* |  | 8.1 (1.7) | 1.4 | 1.0 | 1.9 | <0.001* |
|  |  |  |  |  |  |  |  |  |  |  |  |  |  |  |  |  |  |  |  |  |  |  |  |
|  | **Working ability among those with walking and lifting at work** | | | | | | | | | | | | | | | | | | |  |  |  |  |
| Ages 18 to 34 | 9.0 (1.2) | 0.02 | -0.3 | 0.3 | 0.9 |  | 9.1 (1.1) | -0.009 | -0.2 | 0.2 | 0.9 |  | 9.1 (1.0) | 0.1 | -0.1 | 0.4 | 0.3 |  | 9.1 (1.0) | 0.4 | -0.2 | 0.9 | 0.2 |
| Ages 35 to 44 | 8.8 (1.4) | 0.4 | 0.2 | 0.02 | <0.05 |  | 8.6 (1.3) | 0.01 | -0.3 | 0.3 | 0.9 |  | 8.8 (1.3) | 0.1 | -0.1 | 0.4 | 0.3 |  | 8.7 (0.9) | 0.006 | -0.3 | 0.3 | 0.9 |
| Ages 45 to 54 | 7.6 (2.0) | 0.1 | -0.5 | 0.8 | 0.7 |  | 8.3 (1.3) | 0.3 | -0.04 | 0.6 | 0.09 |  | 8.4 (1.6) | 0.2 | -0.05 | 0.5 | 0.1 |  | 8.3 (1.4) | 0.3 | -0.05 | 0.7 | 0.1 |
| Ages 55 to 64 | 7.5 (2.1) | 0.8 | 0.1 | 1.6 | <0.05 |  | 7.7 (1.8) | 0.9 | 0.5 | 1.4 | <0.001* |  | 7.7 (1.9) | 0.9 | 0.6 | 1.3 | <0.001* |  | 7.6 (1.8) | 1.0 | 0.5 | 1.4 | <0.001* |
|  |  |  |  |  |  |  |  |  |  |  |  |  |  |  |  |  |  |  |  |  |  |  |  |
|  | **Working ability among those with heavy manual labor work** | | | | | | | | | | | | | | | | | | |  |  |  |  |
| Ages 18 to 34 | 9.2 (1.1) | 0.2 | -0.4 | 0.9 | 0.4 |  | 9.0 (1.4) | -0.07 | -0.5 | 0.3 | 0.7 |  | 8.9 (1.4) | -0.2 | -0.6 | 0.2 | 0.3 |  | 8.9 (1.0) | 0.2 | -0.7 | 1.1 | 0.6 |
| Ages 35 to 44 | 7.9 (2.6) | -0.5 | -1.6 | 0.6 | 0.4 |  | 8.5 (1.6) | -0.09 | -0.6 | 0.4 | 0.7 |  | 8.6 (1.4) | -0.04 | -0.5 | 0.4 | 0.9 |  | 8.7 (1.1) | -0.002 | -0.6 | 0.6 | 0.9 |
| Ages 45 to 54 | 7.6 (1.6) | 0.1 | -1.2 | 1.5 | 0.8 |  | 8.0 (1.4) | -0.06 | -0.6 | 0.5 | 0.8 |  | 8.1 (1.8) | -0.006 | -0.4 | 0.4 | 0.9 |  | 8.3 (1.5) | 0.3 | -0.2 | 0.8 | 0.2 |
| Ages 55 to 64 | 8.6 (2.2) | 2.0 | 0.4 | 3.5 | <0.05 |  | 7.0 (2.6) | 0.3 | -0.5 | 1.1 | 0.5 |  | 7.2 (1.7) | 0.4 | -0.2 | 1.0 | 0.2 |  | 7.2 (1.9) | 0.6 | -0.1 | 1.3 | 0.1 |

*Note: SD=Standard deviation, B=estimated coefficient, 95% CI=95% confidence intervals, p-value=Significance of the association between independent variable and dependent variable, * Bonferroni corrected p-value <0.05.*
